# Supplementary material for: Rhombomere-specific analysis reveals the repertoire of genetic cues expressed across the developing hindbrain
Source: PubMed Central journal article supplement (PMC2649922; doi:10.1186/1749-8104-4-6), 2009-02-10

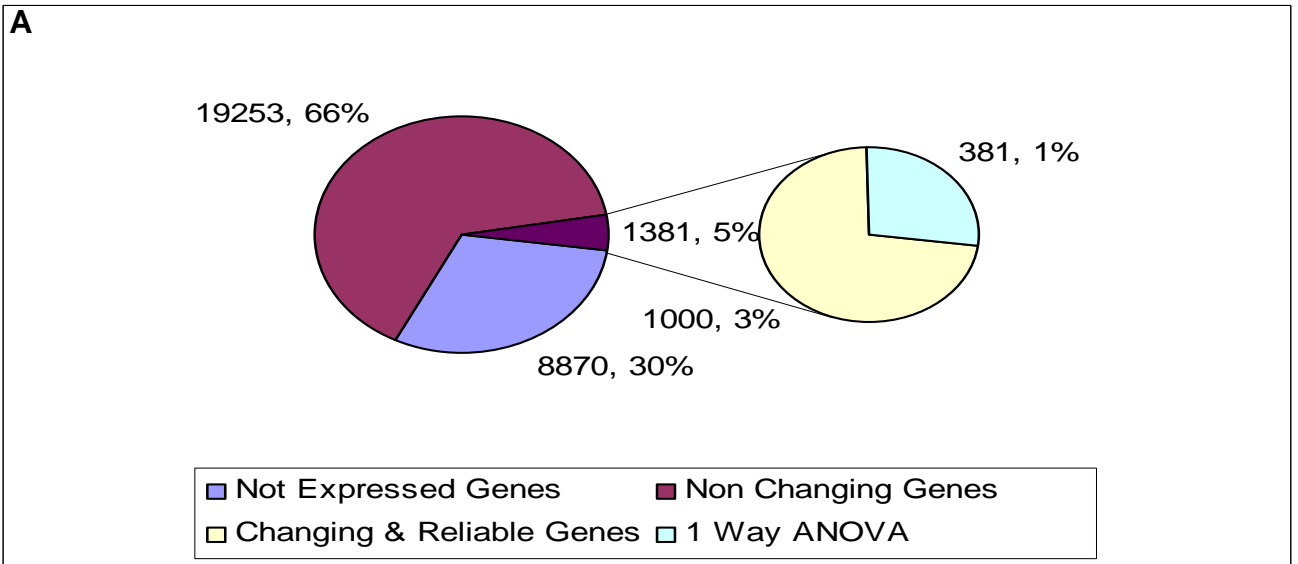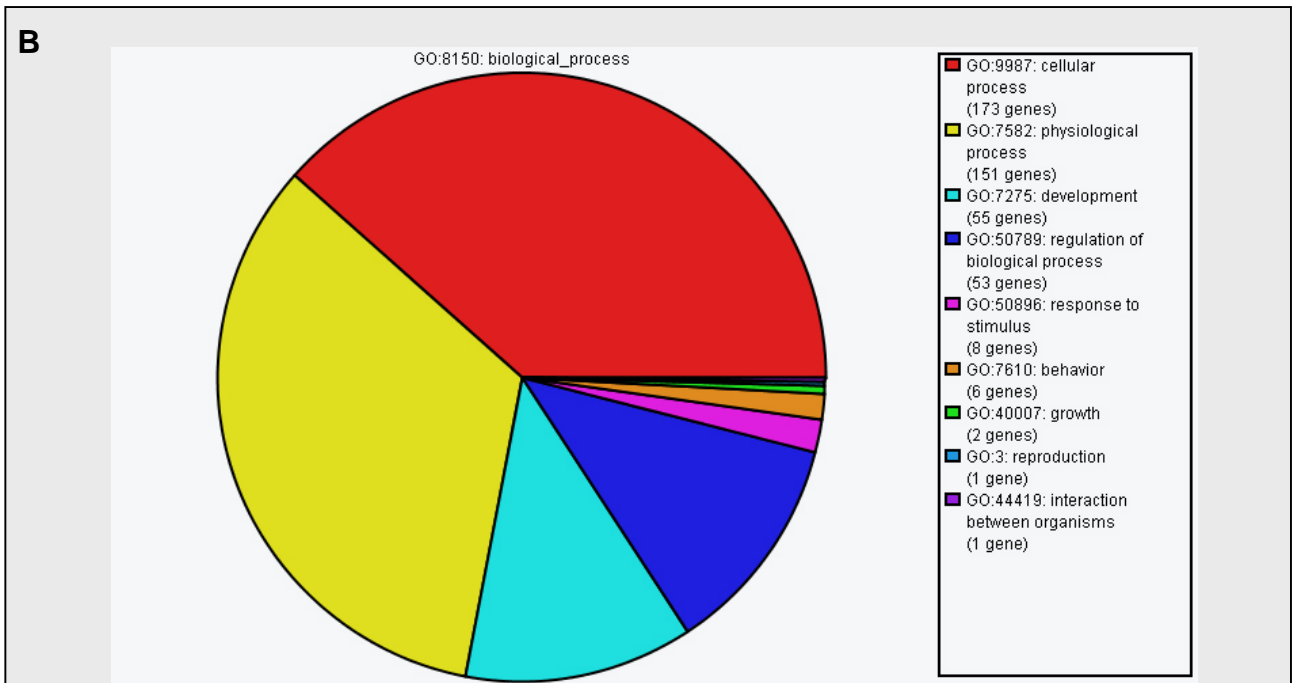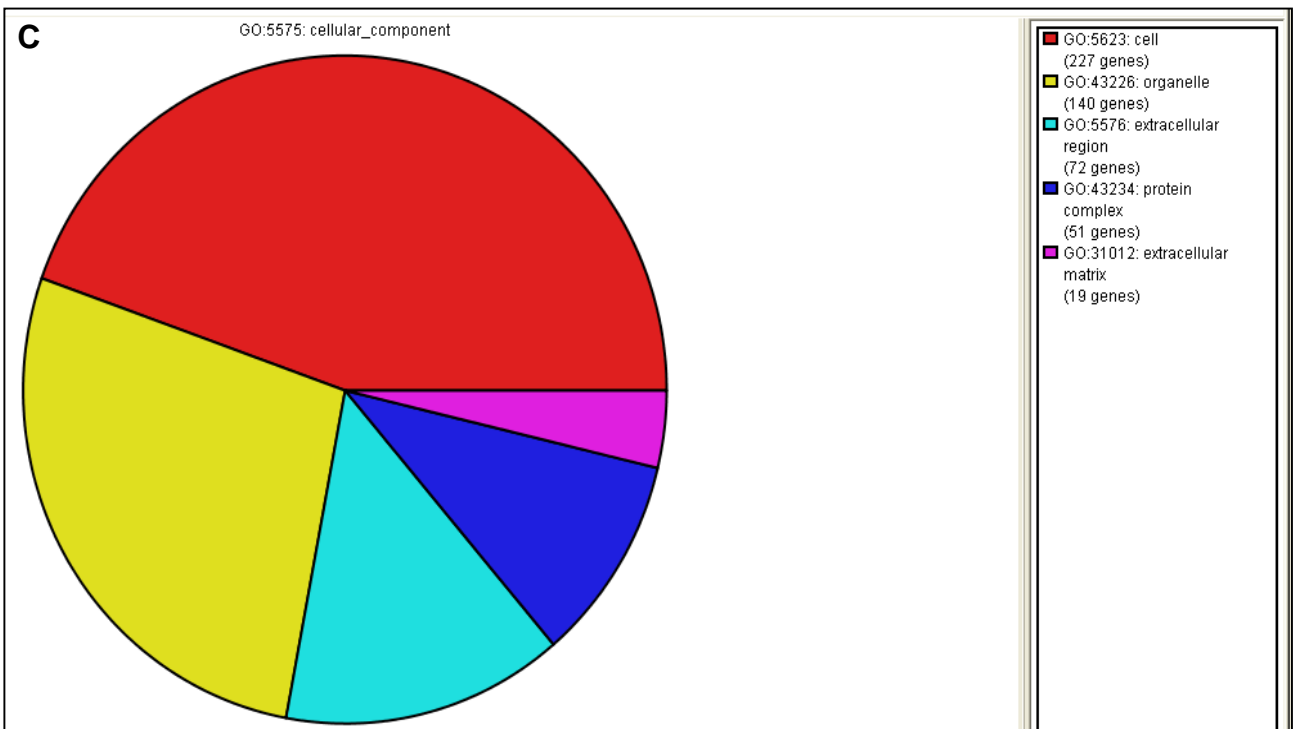

Supplement: 1749-8104-4-6-S2.pdf [file 1749-8104-4-6-S2.pdf]
